# Supplementary material for: Optimization of Formaldehyde Cross-Linking for Protein Interaction Analysis of Non-Tagged Integrinβ1
Source: Hindawi journal article supplement (doi:10.1155/2010/927585), 2010-01-01
Supplement: f1 [file 927585.f1.pdf]

**Table S 1** Mass spectrometric data (GPM) for JB1B immunoprecipitations performed on Jurkat cells.

| <b>Dataset 1</b> |               |               |                    |                     |               |              |           |                  |
|------------------|---------------|---------------|--------------------|---------------------|---------------|--------------|-----------|------------------|
| <i>Protein</i>   | <i>log(e)</i> | <i>log(l)</i> | <i>%(measured)</i> | <i>%(corrected)</i> | <i>unique</i> | <i>total</i> | <i>Mr</i> | <i>Accession</i> |
| ITGB1            | -39.8         | 4.68          | 7                  | 14                  | 6             | 6            | 88.4      | ENSP00000303351  |
| ACTG1            | -23.4         | 4.31          | 2.7                | 3                   | 1             | 1            | 41.8      | ENSP00000331514  |
| DSG1             | -16.4         | 4.02          | 3.6                | 6                   | 3             | 4            | 113.7     | ENSP00000257192  |
| FLG2             | -15.6         | 3.69          | 0.9                | 2                   | 2             | 2            | 247.9     | ENSP00000373370  |
| GAPDHL6          | -7.4          | 3.66          | 4.2                | 6                   | 1             | 1            | 36        | ENSP00000229239  |
| ARG1             | -7.3          | 3.94          | 5.2                | 7                   | 2             | 2            | 35.6      | ENSP00000349446  |
| JUP              | -6            | 3.43          | 1.3                | 2                   | 1             | 1            | 81.7      | ENSP00000377507  |
| ITGA4            | -5.1          | 4.18          | 1                  | 2                   | 1             | 1            | 114.8     | ENSP00000380227  |
| HSP90AA2         | -2.9          | 3.33          | 1.5                | 2                   | 1             | 1            | 84.6      | ENSP00000216281  |
| C1orf68          | -2.1          | 3.59          | 3.2                | 6                   | 1             | 1            | 26.2      | ENSP00000354769  |
| ITGA6            | -1.6          | 3.85          | 0.6                | 1                   | 1             | 1            | 126.5     | ENSP00000264106  |
| <b>Dataset 2</b> |               |               |                    |                     |               |              |           |                  |
| <i>Protein</i>   | <i>log(e)</i> | <i>log(l)</i> | <i>%</i>           | <i>%</i>            | <i>unique</i> | <i>total</i> | <i>Mr</i> | <i>Accession</i> |
| ITGB1            | -118          | 5.01          | 17                 | 34                  | 13            | 13           | 88.4      | ENSP00000303351  |
| ACTG1            | -3.2          | 3.72          | 4.5                | 5                   | 1             | 1            | 41.8      | ENSP00000331514  |
| DSG1             | -18.2         | 4.27          | 3.2                | 6                   | 3             | 3            | 113.7     | ENSP00000257192  |
| FLG2             | -6.3          | 3.43          | 0.4                | 1                   | 1             | 1            | 247.9     | ENSP00000373370  |
| GAPDHL6          | -7            | 3.82          | 4.2                | 6                   | 1             | 1            | 36        | ENSP00000229239  |
| ARG1             | -15.1         | 4.29          | 8.2                | 12                  | 3             | 3            | 35.6      | ENSP00000349446  |
| JUP              | -42.9         | 4.34          | 8.5                | 12                  | 5             | 5            | 81.7      | ENSP00000377507  |
| ITGA4            | -73.1         | 4.76          | 7.5                | 12                  | 9             | 9            | 114.8     | ENSP00000380227  |
| HSP90AA2         | -2.4          | 3.16          | 1.5                | 2                   | 1             | 1            | 84.6      | ENSP00000216281  |
| C1orf68          | -10.1         | 4.37          | 7.6                | 14                  | 2             | 2            | 26.2      | ENSP00000354769  |
| ITGA6            | -40.1         | 4.74          | 5.4                | 8                   | 5             | 6            | 126.5     | ENSP00000264106  |
| ITGA5            | -36.4         | 4.53          | 5.7                | 12                  | 5             | 5            | 114.5     | ENSP00000293379  |
| ITGA1            | -1.7          | 4.02          | 0.6                | 1                   | 1             | 1            | 130.8     | ENSP00000282588  |
| TLN1             | -94.9         | 4.72          | 5                  | 7                   | 12            | 12           | 257.9     | ENSP00000367434  |
| <b>Dataset 3</b> |               |               |                    |                     |               |              |           |                  |
| <i>Protein</i>   | <i>log(e)</i> | <i>log(l)</i> | <i>%</i>           | <i>%</i>            | <i>unique</i> | <i>total</i> | <i>Mr</i> | <i>Accession</i> |
| ITGB1            | -1.5          | 1.02          | 1                  | 2                   | 1             | 1            | 88.4      | ENSP00000303351  |
| ITGA4            | -1.3          | 1.29          | 0.9                | 1                   | 1             | 1            | 114.8     | ENSP00000380227  |
| <b>Dataset 4</b> |               |               |                    |                     |               |              |           |                  |
| <i>Protein</i>   | <i>log(e)</i> | <i>log(l)</i> | <i>%</i>           | <i>%</i>            | <i>unique</i> | <i>total</i> | <i>Mr</i> | <i>Accession</i> |
| ITGB1            | -20.9         | 2.93          | 4.6                | 9                   | 4             | 6            | 88.4      | ENSP00000303351  |
| ITGA4            | -6.5          | 2.88          | 1.8                | 3                   | 2             | 3            | 114.8     | ENSP00000380227  |

**Table S 2** Mass spectrometric data (GPM) for JB1B immunoprecipitations performed on human platelets.

| <b>Dataset 1</b> |               |               |                    |                     |               |              |           |                  |
|------------------|---------------|---------------|--------------------|---------------------|---------------|--------------|-----------|------------------|
| <i>Protein</i>   | <i>log(e)</i> | <i>log(l)</i> | <i>%(measured)</i> | <i>%(corrected)</i> | <i>unique</i> | <i>total</i> | <i>Mr</i> | <i>Accession</i> |
| THBS1            | -46.2         | 4.71          | 6.8                | 9                   | 8             | 8            | 129.3     | ENSP00000260356  |
| ITGA6            | -38.2         | 4.55          | 4.5                | 7                   | 5             | 5            | 126.5     | ENSP00000264106  |
| ITGB1            | -29.8         | 4.54          | 5.6                | 11                  | 4             | 4            | 88.4      | ENSP00000303351  |
| IGHV4-31         | -9.6          | 3.95          | 6                  | 11                  | 2             | 2            | 43.9      | ENSP00000374990  |
| HRNR             | -9.4          | 4.12          | 1.1                | 2                   | 2             | 2            | 282.2     | ENSP00000357791  |
| ITGA2            | -3.4          | 3.87          | 0.7                | 1                   | 1             | 1            | 129.2     | ENSP00000296585  |
| ITGA2B           | -2.8          | 3.99          | 0.9                | 2                   | 1             | 1            | 113.3     | ENSP00000262407  |
| FLG2             | -4            | 3.41          | 0.5                | 1                   | 1             | 1            | 247.9     | ENSP00000373370  |
| <b>Dataset 2</b> |               |               |                    |                     |               |              |           |                  |
| <i>Protein</i>   | <i>log(e)</i> | <i>log(l)</i> | <i>%(measured)</i> | <i>%(corrected)</i> | <i>unique</i> | <i>total</i> | <i>Mr</i> | <i>Accession</i> |
| THBS1            | -140.1        | 5.12          | 15                 | 19                  | 17            | 18           | 129.3     | ENSP00000260356  |
| ITGA6            | -299          | 5.72          | 30                 | 43                  | 30            | 36           | 124       | ENSP00000364369  |
| ITGB1            | -201.1        | 5.49          | 27                 | 55                  | 21            | 27           | 88.4      | ENSP00000303351  |
| IGHV4-31         | -10           | 4.09          | 2.8                | 5                   | 1             | 1            | 43.9      | ENSP00000374990  |
| HRNR             | -20.2         | 4.67          | 1.3                | 3                   | 3             | 4            | 282.2     | ENSP00000357791  |
| ITGA2            | -144.5        | 5.23          | 15                 | 33                  | 18            | 20           | 129.2     | ENSP00000296585  |
| ITGA2B           | -22.8         | 4.08          | 3.7                | 6                   | 4             | 4            | 113.3     | ENSP00000262407  |
| FLG2             | -4.5          | 3.56          | 0.5                | 1                   | 1             | 1            | 247.9     | ENSP00000373370  |
| ITGA5            | -1.8          | 4.02          | 0.6                | 1                   | 1             | 1            | 114.5     | ENSP00000293379  |
| ITGB3            | -40.2         | 4.52          | 7                  | 11                  | 6             | 6            | 87        | ENSP00000262017  |
| TLN1             | -142.2        | 5.11          | 7.9                | 10                  | 17            | 17           | 257.9     | ENSP00000367434  |
| KINDLIN3         | -18.5         | 4.09          | 4.2                | 5                   | 3             | 3            | 75.4      | ENSP00000339950  |
